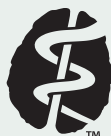

# The American Journal of Psychiatry

Official Journal of the American Psychiatric Association

## Officers 2016–2017

### President

Maria A. Oquendo, M.D., Ph.D.

### President-Elect

Anita S. Everett, M.D.

### Treasurer

Bruce J. Schwartz, M.D.

### Secretary

Altha J. Stewart, M.D.

### Assembly

#### Speaker

Daniel J. Anzia, M.D.

#### Speaker-Elect

Theresa M. Miskimen, M.D.

#### Recorder

James R. Batterson, M.D.

### Office of the CEO and Medical Director

#### CEO and Medical Director

Saul Levin, M.D., M.P.A.

### Board of Trustees

Uchenna Achebe, M.D., M.P.H.

Jeffrey Akaka, M.D.

Lama Bazzi, M.D.

R. Scott Benson, M.D.

Renée L. Binder, M.D.

Ronald M. Burd, M.D.

Stella Cai, M.D.

Jeffrey L. Geller, M.D., M.P.H.

Jeffrey A. Lieberman, M.D.

Roger Peele, M.D.

Vivian B. Pender, M.D.

Gail E. Robinson, M.D.

Paul Summergrad, M.D.

Richard F. Summers, M.D.

Melinda Young, M.D.

## Editorial Board

### Editor

Robert Freedman, M.D.

### Deputy Editors

David A. Lewis, M.D.

Robert Michels, M.D.

Daniel S. Pine, M.D.

A. John Rush, M.D.

Susan K. Schultz, M.D.

Carol A. Tamminga, M.D.

### Associate Editors

Alan Brown, M.D., M.P.H.

Tyrone Cannon, Ph.D.

Benjamin G. Druss, M.D., M.P.H.

Felton Earls, M.D.

Graham J. Emslie, M.D.

Yasmin Hurd, Ph.D.

Joan L. Luby, M.D.

Constantine G. Lyketsos, M.D., M.H.S.

Helen S. Mayberg, M.D., F.R.C.P.C.

Terrie E. Moffitt, Ph.D.

Rajesh Narendran, M.D.

Roy Perlis, M.D.

Anita Thapar, M.B.B.Ch., F.R.C.Psych.,

Ph.D., F.Med.Sci.

Mauricio Tohen, M.D., Dr.PH., M.B.A.

Eduard Vieta, M.D., Ph.D.

Katherine L. Wisner, M.D., M.S.

Xin Yu, M.D.

### Editor Emerita

Nancy C. Andreasen, M.D., Ph.D.

### Former Editors

Amariah Brigham, M.D., 1844–1849

T. Romeyn Beck, M.D., 1849–1854

John P. Gray, M.D., 1854–1886

G. Alder Blumer, M.D., 1886–1894

Richard Dewey, M.D., 1894–1897

Henry M. Hurd, M.D., 1897–1904

Edward N. Brush, M.D., 1904–1931

Clarence B. Farrar, M.D., 1931–1965

Francis J. Braceland, M.D., 1965–1978

John C. Nemiah, M.D., 1978–1993

### Editorial Staff

#### Executive Editor

Michael D. Roy

#### Senior Editors

John J. Guardiano, Ph.D.

Jane Weaver

#### Production Manager

Susan Westrate

#### Assistant Editor

Angela Moore

#### Online Content Manager

Michael Pogachar

#### Editorial Support Services Manager

Heidi Koch

#### Editorial Assistant

Linda LaCour

#### Spanish Content Manager

Sergi Casals, M.A.

#### Assistants to the Editors

Lois Lilienthal

Laura English

Rachel Hogg

Russell A. Scholl

### Publisher

Rebecca D. Rinehart

# The Residents' JOURNAL

## The American Journal of Psychiatry Residents' Journal

February 2017

Volume 12

Issue 2

### Inside

- 2 Life, Death, and Mind-Body Medicine Across the Lifespan**  
David Saunders, M.D.  
*Emphasis on the vulnerability of the body to the devastating effects of mental illness and vice versa.*
- 3 Lithium in Child and Adolescent Bipolar Disorder**  
Max S. Rosen, M.D.  
*Examining the mechanism of action, pharmacokinetics and drug interactions, clinical use and efficacy, as well as side effects.*
- 6 Pediatric Delirium**  
Robyn P. Thom, M.D.  
*Analyzing clinical characteristics, sequelae, diagnosis, management, and preventive strategies.*
- 9 Very Early-Onset Schizophrenia in a Six-Year-Old Boy**  
Samantha Slomiak, B.S., Dena R. Matalon, M.D., Lisa Roth, M.D., M.S.  
*Identifying heritability factors and clinical signs preceding a psychotic break.*
- 12 Amelioration of Aggression and Echolalia With Propranolol in Autism Spectrum Disorder**  
Matthew W. Schelke, B.A.  
*Discussion of the role of the adrenergic system in adaptive response and therapeutic use of beta blockers.*
- 15 Elopement in Children With Autism Spectrum Disorder**  
Veeraraghavan J. Iyer, M.B.B.S., M.D.  
*Investigation of cartoon perception and facial recognition differences.*
- 18 Neuropsychiatric Symptoms in the Pediatric Population After Administration of Osetamivir**  
Shariq F. Haque, M.D., Sobha Nizami, M.D.  
*Discussion of a case of delayed-onset psychiatric manifestations of drug administration, with emphasis on risk-benefit assessment.*
- 21 Residents' Resources**

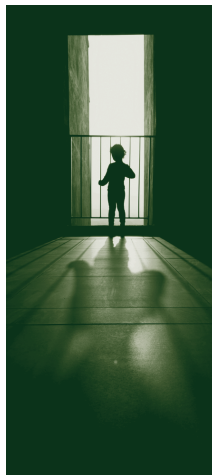

© Shutterstock.com

#### EDITOR-IN-CHIEF

Katherine Pier, M.D.

#### SENIOR DEPUTY EDITOR

Rachel Katz, M.D.

#### DEPUTY EDITOR

Oliver Glass, M.D.

#### GUEST EDITOR

David Saunders, M.D.

#### ASSOCIATE EDITORS

Gopalkumar Rakesh, M.D.  
Janet Charoensook, M.D.

#### MEDIA EDITOR

Michelle Liu, M.D.

#### CULTURE EDITOR

Aparna Atturu, M.D.

#### STAFF EDITOR

Angela Moore

#### EDITORS EMERITI

Rajiv Radhakrishnan, M.B.B.S., M.D.  
Misty Richards, M.D., M.S.

#### EDITORS EMERITI

Arshya Vahabzadeh, M.D.  
Monifa Seawell, M.D.  
Sarah M. Fayad, M.D.

#### EDITORS EMERITI

Joseph M. Cerimele, M.D.  
Molly McVoy, M.D.  
Sarah B. Johnson, M.D.

#### Editor-in-Chief

Katherine Pier, M.D.

#### Senior Deputy Editor

Rachel Katz, M.D.

#### Deputy Editor

Oliver Glass, M.D.

#### Associate Editors

Gopalkumar Rakesh, M.D.

Janet Charoensook, M.D.

*The Residents' Journal*, the largest and most robust resident-led journal in the house of medicine, is an e-publication that serves as a forum to share your ideas and experiences in training, clinical practice, research, and careers with your colleagues.

To submit a manuscript, please visit [mc.manuscriptcentral.com/appi-ajp](http://mc.manuscriptcentral.com/appi-ajp) and select a manuscript type for AJP Residents' Journal. You may submit a commentary (500 words), book review (500 words), history of psychiatry (500 words), clinical case conference (1,250 words), review article (1,500 words), treatment in psychiatry article (1,500 words), research article (1,250 words), drug review (1,500 words), or letter to the editor (250 words).

*The Residents' Journal* is sent free-of-charge to all psychiatry residents. Anyone interested in being included on the distribution list should contact Angela Moore, *The Residents' Journal* staff editor at [ajp@psych.org](mailto:ajp@psych.org) with "Subscribe to Residents' Journal" in the subject line.

To access the complete Residents' Journal archives, visit [ajp.psychiatryonline.org/residents\\_journal](http://ajp.psychiatryonline.org/residents_journal)

# THE AMERICAN PSYCHIATRIC ASSOCIATION

1000 Wilson Blvd., Suite 1825, Arlington, VA 22209-3901  
(888) 357-7924 (toll-free inside the U.S. and Canada) / (703) 907-7300  
web site: [www.psychiatry.org](http://www.psychiatry.org) • e-mail: [apa@psych.org](mailto:apa@psych.org)

## Chairpersons of Councils, Committees, and Task Forces

### Standing Committees

|                             |                          |
|-----------------------------|--------------------------|
| <b>Bylaws</b>               | Edythe Harvey, M.D.      |
| <b>Elections</b>            | Barry K. Herman, M.D.    |
| <b>Ethics</b>               | Ezra Griffith, M.D.      |
| <b>Finance and Budget</b>   | Alan F. Schatzberg, M.D. |
| <i>Audit</i>                | Bruce J. Schwartz, M.D.  |
| <i>Investment Oversight</i> | David Fassler, M.D.      |
| <b>Joint Reference</b>      | Anita S. Everett, M.D.   |
| <b>Membership</b>           | Rahn K. Bailey, M.D.     |
| <b>Nominating</b>           | Renee Binder, M.D.       |
| <b>Tellers</b>              | Jose Vito, M.D.          |

### Councils

#### **Council on Addiction Psychiatry**

Frances R. Levin, M.D.

#### **Council on Advocacy and Government Relations**

Debra Pinals, M.D.

*Advocacy and Litigation Funding*

Jeffrey Akaka, M.D.

#### **Council on Children, Adolescents, and Their Families**

Joseph V. Penn, M.D.

#### **Council on Communications**

Christopher Ramsey, M.D.

#### **Council on Geriatric Psychiatry**

Robert P. Roca, M.D.

#### **Council on Healthcare Systems and Financing**

Harsh K. Trivedi, M.D.

*Reimbursement for Psychiatric Care*

Laurence Miller, M.D.

*RBRVS, Codes and Reimbursement*

Gregory G. Harris, M.D.

*Telepsychiatry*

James H. Shore, M.D.

#### **Council on International Psychiatry**

Bernardo Ng, M.D.

#### **Council on Medical Education and Lifelong Learning**

Mark H. Rapaport, M.D.

*Scientific Program*

Philip Muskin, M.D.

*Vestmark Award Committee*

Jonathan F. Borus, M.D.

#### **Council on Minority Mental Health and Health Disparities**

Christina V. Mangurian, M.D.

#### **Council on Psychiatry and Law**

Steven K. Hoge, M.D.

*Judicial Action*

Marvin S. Swartz, M.D.

#### **Council on Psychosomatic Medicine (Consultation Liaison Psychiatry)**

David F. Gitlin, M.D.

#### **Council on Quality Care**

Grayson Norquist, M.D.

*Mental Health Information Technology*

Steven Daviss, M.D.

*Performance Measures*

Karen Pierce, M.D.

*Steering Committee on Practice Guidelines*

Michael J. Vergare, M.D.

#### **Council on Research**

Dwight L. Evans, M.D.

*Psychiatric Dimensions of Disasters*

Robert J. Ursano, M.D.

# Go Online

Visit [ajp.psychiatryonline.org](http://ajp.psychiatryonline.org) for these features!

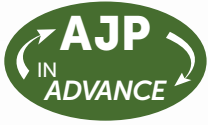

## AJP in Advance

*Discover the latest research advances before they appear in print*

### **The Risk of Treatment-Emergent Mania With Methylphenidate in Bipolar Disorder**

Methylphenidate may be associated with treatment-emergent mania in patients with bipolar disorder not receiving concomitant mood stabilizer treatment.

### **The Origins of Cognitive Deficits in Victimized Children: Implications for Neuroscientists and Clinicians**

Cognitive deficits previously described in individuals with a history of childhood victimization are largely explained by preexisting cognitive vulnerabilities and nonspecific effects of socioeconomic disadvantage.

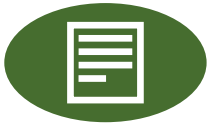

## AJP CME

*Earn CME credit: 3 courses per issue*

This month's courses appear on pages 299–302. Each short course is based on one article in this issue and can earn up to 1 *AMA PRA Category 1 Credit™*. CME credit is issued only **online**, and a paid subscription to AJP's CME course program is required.

Visit [psychiatryonline.org/cme](http://psychiatryonline.org/cme) and click on the "American Journal of Psychiatry" tab.

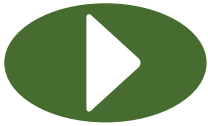

## AJP Multimedia

*Access Audio or Video for highlights of each issue*

In AJP Audio this month, Executive Editor Michael Roy discusses collaboration between psychiatry and obstetrics, prescription opioid use disorder during pregnancy, integrated behavioral health homes, a possible relationship between Alzheimer's disease and low hippocampal volume in late-life depression, switch rates during lithium and sertraline treatment of bipolar II depression, internet gaming disorder, and the relation of mental health to social networks following disaster.

In this month's video, Deputy Editor Daniel S. Pine, M.D., also discusses switch rates during lithium and sertraline treatment of bipolar II depression and the relation of mental health to social networks following disaster.

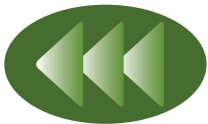

## History of Psychiatry

*Revisit the field's rich history through the pages of AJP*

### **50 and 75 years ago this month: Adoption of new media technologies**

In the March 1942 issue, Dr. Alexander H. Leighton and Dr. Theodore Lidz, in an article titled "The Talking Pictures in Psychiatric Teaching and Research," discuss the use of video as a supplement to patient contact in medical education and as an ancillary record in neuropsychiatric research.

In the March 1967 issue, in an article titled "The Use of Stereophonic Audiotape Recording in Supervision of Psychotherapy," Dr. Harry A. Wilmer discusses the use of audio recording to create "a truthful, faithful, and reproducible record" of psychotherapy sessions.
