MARCH 2017 | VOLUME 174 | NUMBER 3

# The American Journal of Psychiatry

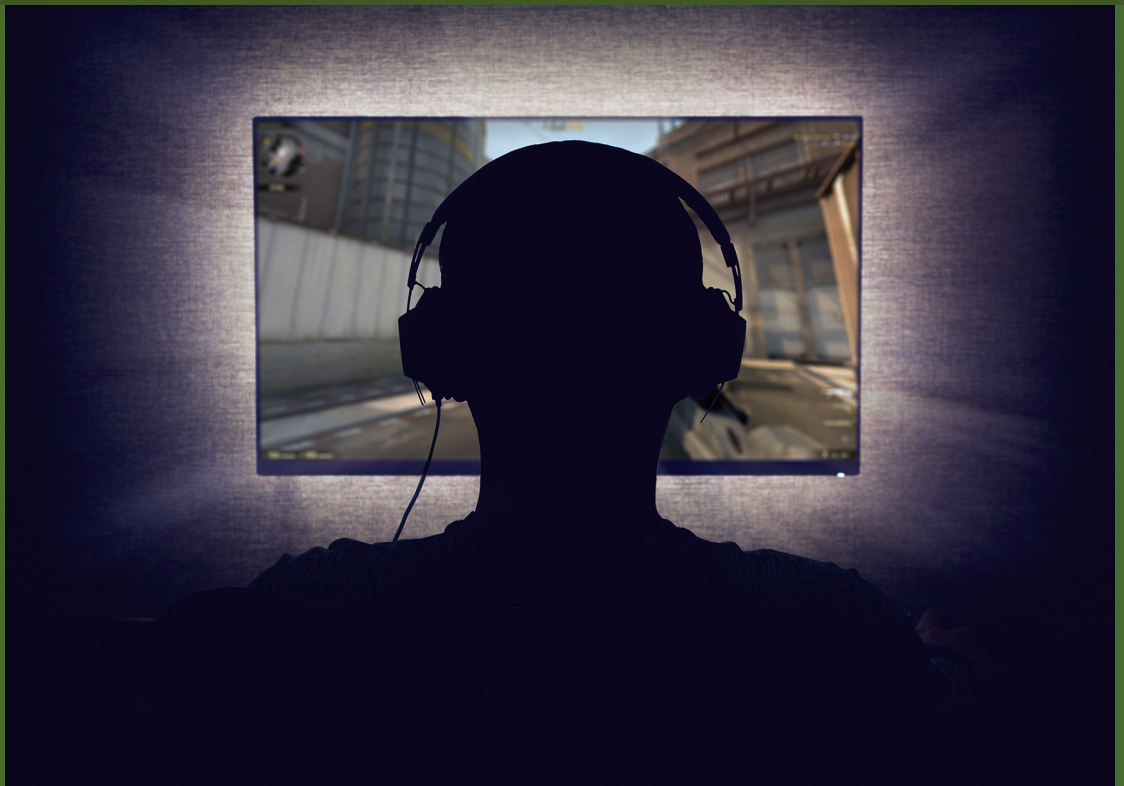

Internet Gaming Disorder: Investigating the Clinical Relevance  
of a New Phenomenon

Treatment-Resistant Schizophrenia: Treatment Response and  
Resistance in Psychosis (TRRIP) Working Group Consensus  
Guidelines on Diagnosis and Terminology

No Association of Lower Hippocampal Volume With  
Alzheimer's Disease Pathology in Late-Life Depression

AMERICAN  
**PSYCHIATRIC**  
ASSOCIATION 

[ajp.psychiatryonline.org](http://ajp.psychiatryonline.org)
